1 Potential Pharmacodynamic Mechanism of the Main ingredients in  
2 Licorice for Chronic Obstructive Pulmonary Disease

3 Cai Chen<sup>1&</sup>, Jianpeng An<sup>2&</sup>, Guodong Shen<sup>1</sup>, Yang Shen<sup>3#</sup>

4 <sup>1</sup>Shandong Institute of Advanced Technology Chinese Academy of Sciences, Jinan, 250000,  
5 China.

6 <sup>2</sup>Integrated Traditional Chinese and Western Medicine Hospital of Tongzhou District, Beijing,  
7 China

8 <sup>3</sup>Ministry of Environmental Protection, School of Public Health, Tongji Medical College,  
9 Huazhong University of Science and Technology, #13 Hangkong Road, Wuhan, 430030,  
10 Hubei, China

11

12 &These authors contributed equally to this work.

13 \*Corresponding author: YangShen

14 Ministry of Environmental Protection, School of Public Health, Tongji Medical College,  
15 Huazhong University of Science and Technology, #13 Hangkong Road, Wuhan, 430030,  
16 Hubei, China.

17

18 **Abstract**

19

20 Purpose: This study aimed to investigate the effect of essential ingredients of  
21 licorice on the chronic obstructive pulmonary disease (COPD). Method: The  
22 ingredients information were obtained from *PubChem*  
23 (<https://pubchem.ncbi.nlm.nih.gov/>), related genes about COPD was collected from  
24 *geneCards* (<http://www.genecards.org/>). Network pharmacology was utilized in this  
25 study. Result: The intersection data set contains 20 molecular targets between COPD  
26 and licorice. Protein-protein interaction network showed that there are a total of 58  
27 nodes and 137 edges involved. The link number of AKT1 in PPI network was 39,  
28 which is the highest level of interaction. MAPK1 is an important target of Licorice on  
29 COPD. Conclusion: MAPK signaling pathway could be the important key target of  
30 main ingredients of licorice on COPD.

31

32 **Keyword:** COPD, licorice, Gene Ontology, Kyoto Encyclopedia of Genes  
33 and Genomes, network pharmacology

34

35

36

## 37 **I. Introduction**

38 Chronic obstructive pulmonary disease (COPD) is one of the common preventable  
39 and treatable disease, with the emblematic symptom of persistent airflow restriction,  
40 which is associated with an increased chronic inflammatory response of the airways  
41 and lungs to toxic particles or gases[1-4]. According to the World Health Organization,  
42 approximately 3 million people in the world dead as a consequence of COPD each  
43 year. One meta-analysis of global prevalence of COPD, which purposed to examine  
44 the global prevalence of COPD in men and women, revealed that prevalence rate of  
45 COPD was 9.23% (95% CI:8.16%-10.36%) among male group and 6.16% (95%  
46 CI:5.41%-6.95%) among female group[5]. Moreover, there were some complications  
47 of COPD, such as cardiovascular disease, anxiety and depression, lung cancer [6-8],  
48 which leads to the lower living quality and much more burden of patient's life[9, 10].

49

50 Liquorice, widely distributed among Asia, Europe, America, etc., has been used  
51 as medicinal material for long years[11-13]. Some researches have proved that  
52 liquorice has the function of anti-inflammation, preventing coughing, antianaphylaxis  
53 and so on[14, 15]. It was reported that the essential ingredients of liquorice are  
54 glycyrrhizic acid, glycyrrhizin, quercetin, and formononetin[16, 17]. Generally,  
55 liquorice, the whole plant is utilized to made as pills or decoction. Consequently, the  
56 mechanism and molecular pathways for every component was not clear. Up to now,  
57 much researches concentrated on the biological effect of liquorice as a whole, while  
58 the molecular effect of its every component hasn't been figured out. Considering its  
59 bargain price, widespread distribution and unique biological effect, this research  
60 purposed to investigate the mechanism of essential component's signaling pathways  
61 (formononetin, liquiritin, glycyrrhizic acid, glabridin, quercetin and isoliquiritigenin)  
62 based on network pharmacology.

63

## 64 II. Method and Materials

65 The ingredients of liquorice involved in this research were formononetin,  
66 liquiritin, glycyrrhizic acid, glabridin, quercetin and isoliquiritigenin, respectively.  
67 Their two-dimension and three-dimension struction were from public database,  
68 *PubChem* (<https://pubchem.ncbi.nlm.nih.gov/>). Pharmacokinetic information of these  
69 compound was obtained from *Traditional Chinese Medicine Systems Pharmacology*  
70 (*TCMSP*), including drug-likeness (DL), oral bioavailability (OB), intestinal epithelial  
71 permeability (Caco-2) and number of H-bond donor/acceptor (Hdon/Hacc).

72

73 The target molecule of the Liquorice ingredients were attained from public  
74 database *Swisstargetprediction* (<http://www.swisstargetprediction.ch/>). The potential  
75 molecular target was selected when the probability was above zero. The related genes  
76 about COPD was collected from *geneCards* (<http://www.genecards.org/>), and the  
77 genes were used in this research when *relevance score* was more than 30.

78

79 Construction and analysis of component-action target network was based on  
80 Cytoscape software (version 3.7.2). Six compound and common target between  
81 COPD and Liquorice was imported to Cytoscape, after position adjustment network  
82 was finished.

83

84 The String database (<https://string-db.org/>) is one database containing known and  
85 predicted protein-protein interactions, in which a large number of protein-protein  
86 interactions were collected, involving a total of 9643763 proteins and 138838440  
87 interactions, including data detected experimentally and predicted by bio-information  
88 methods. The common targets between disease and Liquorice were imported into the  
89 String database to define human species and obtain the protein interaction relationship.

90 The results were saved in TSV format. The node1, node2 and combined score  
91 information in the file was retained and imported into Cytoscape software to draw the  
92 interaction network. The core of protein-protein interaction network was calculated in  
93 R software. Then GO enrichment analysis and KEGG pathway annotation analysis  
94 were finished in *Rstudio* with the p-value <0.05 as well.

### 95 III. Result

96 **Figure 1** and **Figure 2** showed the two and three dimension structure of  
97 formononetin, liquiritin, glycyrrhizin, glabridin, quercetin and isoliquiritigenin,  
98 respectively. Pharmacokinetic information was illustrated in **Table 1**. The number of  
99 H-bond donor/acceptor for formononetin, liquiritin, glycyrrhizin, glabridin, quercetin  
100 and isoliquiritigenin were 1/4, 8/16, 5/9, 2/4, 5/7 and 6/9, respectively. The oral  
101 bioavailability of formononetin, liquiritin, glycyrrhizin, glabridin, quercetin and  
102 isoliquiritigenin were 69.67, 9.06, 65.69, 53.25, 46.43 and 8.61, respectively.

103

104 There were 417 target molecule for COPD according to relevance score  
105 mentioned above and 64 target molecule for Licorice (**Figure 3**). The intersection  
106 data set contains 20 molecular targets between COPD and licorice. The information  
107 of the six active ingredients and molecular targets of Licorice was introduced into  
108 Cytoscape to construct the network, as shown in **Figure 4**. There are a total of 58  
109 nodes and 137 edges involved. The black type indicates the six ingredients of Licorice,  
110 blue ellipse represented the potential target. It can be seen from the **Figure 4** that the  
111 same target could be corresponding to different active ingredients or the same active  
112 ingredient, which fully reflects the multi-component and multi-target action  
113 characteristics of Licorice.

114

115 **Figure 5** was the result after the process of String database. Color 'green' is the  
116 gene neighborhood, 'black' represents the co-expression, 'blue' is gene co-occurrence,

117 'red' is the gene fusions. As shown in **Figure 6**, the link number of AKT1 was 39,  
118 which is the highest level of interaction. **Figure 7** presented the top ten key targets.  
119 GO enrichment analysis is a finite acyclic graph that counts the number or  
120 composition of proteins or genes at a functional level. The generatio of endopeptidase  
121 activity and phosphatase were greater than the others. Nuclear receptor activity and  
122 transcription factor activity, direct legend regulated sequence specific DNA binding  
123 were least (**Figure 8**, **Table 2**). The results of KEGG analysis are shown in **Figure 9**.  
124 The counts of proteoglycans in cancer, endocrine resistance, MAPK signaling  
125 pathway, EGFR tyrosine kinase inhibitor resistance, relaxin signaling pathway, Rap1  
126 signaling pathway was 14,12, 12,10,10 and 10, respectively.

#### 127 IV. Discussion

128 COPD is a chronic bronchitis and/or emphysema characterized by airflow  
129 obstruction that could progress to pulmonary-heart disease and respiratory failure as a  
130 common chronic disease[2, 4, 18]. It has been formed a broad consensus that COPD  
131 is associated with abnormal inflammatory reactions with high morbidity and  
132 mortality[19]. Licorice has been internationally utilized for medicinal herb, while its  
133 mechanism of some main ingredients for COPD still kept unclear. The purpose of the  
134 present study was to investigate the effect of main ingredients on COPD according to  
135 network pharmacology.

136  
137 In this study, it revealed that Akt1 is the common target between COPD and  
138 licorice. AKT1, also named as protein kinase B, is one of 3 closely related  
139 serine/threonine-protein kinases (AKT1, AKT2 and AKT3) called the AKT kinase,  
140 and which regulates many processes including metabolism, proliferation, cell survival,  
141 growth and angiogenesis[20-22]. It appeared as one key node in PI3K-AKT signaling,  
142 protects against acute lung injury[23]. Qu's experiment indicated that glycyrrhizic  
143 acid inhibited the production of inflammatory factors in LPS-induced ALI by

144 regulating the PI3K/AKT/mTOR pathway related autophagy[24]. Vito Lorusso and  
145 Ilaria Marech summarized that isoliquiritigenin could suppress HIF-1 $\alpha$  level, VEGF  
146 expression and secretion, cell migration and to reduce the expression and secretion of  
147 MMP-9/-2 and these effects might be mediated through inhibition of p38, PI3K/Akt  
148 and NF- $\kappa$ B signaling pathways[25].

149

150 As shown in **Figure 8**, MAPK1 was one of critical targets, which is an important  
151 transmitter of signals from the cell surface to the inside of the nucleus. The result of  
152 KEGG enrichment analysis also illustrated that licorice relieves COPD symptoms via  
153 MAPK signaling pathway. It has been reported that MAPK pathway is one of the  
154 common intersection pathways of signal transduction pathways including stress,  
155 inflammation, cell proliferation, differentiation, functional synchronization,  
156 transformation, apoptosis and so on. Previous studies demonstrated that MAPK signal  
157 pathway was involved in the inflammation reaction and oxidative stress[26, 27].  
158 Some researchers also found that the ingredients of licorice has the function to  
159 mediate the expression of MAPK signaling pathway[28, 29].

160

161 The limitation of the present study was that this study was performed abstractly,  
162 in the future study, we will operate animal experiment to prove it with ethical  
163 approval.

164

## 165 V. Conclusion

166 MAPK signaling pathway could be the important key target of main ingredients  
167 of licorice on COPD.

## 168 VI. Availability of data and materials

169 The ingredients of liquorice involved were attained from *PubChem*  
170 (<https://pubchem.ncbi.nlm.nih.gov/>). Pharmacokinetic information of these compound  
171 was obtained from *Traditional Chinese Medicine Systems Pharmacology (TCMSP)*.

172 The target molecule of the Liquorice ingredients were attained from public  
173 database *Swisstargetprediction* (<http://www.swisstargetprediction.ch/>). The related  
174 genes about COPD was collected from *geneCards* (<http://www.genecards.org/>).

## 175 VII. Consent to Publish

176 All author consent to publish this article in this article.

## 177 Conflict of Interest

178 The authors declare that they have no conflict of interest.

## 179 Acknowledgement

180 This study was supported by Project of Jinan "20 Universities" (#2019GXRC040).

181

182

183

184

185

186

187



188

189

190

## References:

191 [1]. Wedzicha JA, Seemungal TA. COPD exacerbations: defining their cause and prevention[J].  
192 LANCET. 2007;370(9589):786-96.

193 [2]. Welte T, Vogelmeier C, Papi A. COPD: early diagnosis and treatment to slow disease  
194 progression[J]. INT J CLIN PRACT. 2015;69(3):336-49.

195 [3]. Agrawal R, Moghtader S, Ayyala U, Bandi V, Sharafkhaneh A. Update on management of stable  
196 chronic obstructive pulmonary disease[J]. J THORAC DIS. 2019;11(Suppl 14):S1800-9.

197 [4]. Qaseem A, Wilt TJ, Weinberger SE, Hanania NA, Criner G, van der Molen T, Marciniuk DD,  
198 Denberg T. Diagnosis and management of stable chronic obstructive pulmonary disease: a clinical  
199 practice guideline update from the American College of Physicians, American College of Chest  
200 Physicians, American Thoracic Society, and European Respiratory Society[J]. ANN INTERN MED.  
201 2011;155(3):179-91.

202 [5]. Ntritsos G, Franek J, Belbasis L, Christou MA, Markozannes G, Altman P, Fogel R, Sayre T.  
203 Gender-specific estimates of COPD prevalence: a systematic review and meta-analysis[J]. Int J Chron  
204 Obstruct Pulmon Dis. 2018;13:1507-14.

205 [6]. Houghton AM. Mechanistic links between COPD and lung cancer[J]. NAT REV CANCER.  
206 2013;13(4):233-45.

207 [7]. Rabe KF, Hurst JR, Suissa S. Cardiovascular disease and COPD: dangerous liaisons?[J]. Eur  
208 Respir Rev. 2018;27(149).

209 [8]. Pooler A, Beech R. Examining the relationship between anxiety and depression and exacerbations  
210 of COPD which result in hospital admission: a systematic review[J]. Int J Chron Obstruct Pulmon Dis.  
211 2014;9:315-30.

212 [9]. Miravittles M, Ribera A. Understanding the impact of symptoms on the burden of COPD[J].  
213 Respir Res. 2017;18(1):67.

214 [10]. Zhu B, Wang Y, Ming J, Chen W, Zhang L. Disease burden of COPD in China: a systematic  
215 review[J]. Int J Chron Obstruct Pulmon Dis. 2018;13:1353-64.

216 [11]. Dastagir G, Rizvi MA. Review - Glycyrrhiza glabra L. (Licorice)[J]. PAK J PHARM SCI.  
217 2016;29(5):1727-33.

218 [12]. Maria PG, Sara F, Mario F, Lorenza S. Biological Effects of Licochalcones[J]. Mini Rev Med  
219 Chem. 2019;19(8):647-56.

220 [13]. Wang X, Zhang H, Chen L, Shan L, Fan G, Gao X. Licorice, a unique "guide drug" of  
221 traditional Chinese medicine: a review of its role in drug interactions[J]. J ETHNOPHARMACOL.  
222 2013;150(3):781-90.

223 [14]. Ramalingam M, Kim H, Lee Y, Lee YI. Phytochemical and Pharmacological Role of  
224 Liquiritigenin and Isoliquiritigenin From Radix Glycyrrhizae in Human Health and Disease Models[J].  
225 FRONT AGING NEUROSCI. 2018;10:348.

226 [15]. Yang R, Yuan BC, Ma YS, Zhou S, Liu Y. The anti-inflammatory activity of licorice, a widely  
227 used Chinese herb[J]. PHARM BIOL. 2017;55(1):5-18.

228 [16]. Pastorino G, Cornara L, Soares S, Rodrigues F, Oliveira M. Licorice (Glycyrrhiza glabra): A  
229 phytochemical and pharmacological review[J]. PHYTOTHER RES. 2018;32(12):2323-39.

230 [17]. Sun ZG, Zhao TT, Lu N, Yang YA, Zhu HL. Research Progress of Glycyrrhizic Acid on Antiviral

- 231 Activity[J]. *Mini Rev Med Chem*. 2019;19(10):826-32.
- 232 [18]. Chen C, Liu X, Wang X, Qu W, Li W, Dong L. Effect of air pollution on hospitalization for acute  
233 exacerbation of chronic obstructive pulmonary disease, stroke, and myocardial infarction[J]. *Environ*  
234 *Sci Pollut Res Int*. 2020;27(3):3384-400.
- 235 [19]. Li MH, Fan LC, Mao B, Yang JW, Choi A, Cao WJ, Xu JF. Short-term Exposure to Ambient  
236 Fine Particulate Matter Increases Hospitalizations and Mortality in COPD: A Systematic Review and  
237 Meta-analysis[J]. *CHEST*. 2016;149(2):447-58.
- 238 [20]. Nicholson KM, Anderson NG. The protein kinase B/Akt signalling pathway in human  
239 malignancy[J]. *CELL SIGNAL*. 2002;14(5):381-95.
- 240 [21]. Hers I, Vincent EE, Tavare JM. Akt signalling in health and disease[J]. *CELL SIGNAL*.  
241 2011;23(10):1515-27.
- 242 [22]. Heron-Milhavet L, Khouya N, Fernandez A, Lamb NJ. Akt1 and Akt2: differentiating the  
243 aktion[J]. *HISTOL HISTOPATHOL*. 2011;26(5):651-62.
- 244 [23]. Reddy NM, Potteti HR, Vegiraju S, Chen HJ, Tamatam CM, Reddy SP. PI3K-AKT Signaling via  
245 Nrf2 Protects against Hyperoxia-Induced Acute Lung Injury, but Promotes Inflammation Post-Injury  
246 Independent of Nrf2 in Mice[J]. *PLOS ONE*. 2015;10(6):e129676.
- 247 [24]. Qu L, Chen C, He W, Chen Y, Li Y, Wen Y, Zhou S, Jiang Y. Glycyrrhizic acid ameliorates  
248 LPS-induced acute lung injury by regulating autophagy through the PI3K/AKT/mTOR pathway[J].  
249 *AM J TRANSL RES*. 2019;11(4):2042-55.
- 250 [25]. Lorusso V, Marech I. Novel plant-derived target drugs: a step forward from licorice?[J]. *Expert*  
251 *Opin Ther Targets*. 2013;17(4):333-5.
- 252 [26]. Guan R, Wang J, Li D, Li Z, Liu H, Ding M, Cai Z, Liang X. Hydrogen sulfide inhibits cigarette  
253 smoke-induced inflammation and injury in alveolar epithelial cells by suppressing  
254 PHD2/HIF-1 $\alpha$ /MAPK signaling pathway[J]. *INT IMMUNOPHARMACOL*. 2020;81:105979.
- 255 [27]. Sun Y, Liu WZ, Liu T, Feng X, Yang N, Zhou HF. Signaling pathway of MAPK/ERK in cell  
256 proliferation, differentiation, migration, senescence and apoptosis[J]. *J Recept Signal Transduct Res*.  
257 2015;35(6):600-4.
- 258 [28]. Frattaruolo L, Carullo G, Brindisi M, Mazzotta S, Bellissimo L, Rago V, Curcio R, Dolce V.  
259 Antioxidant and Anti-Inflammatory Activities of Flavanones from *Glycyrrhiza glabra* L. (licorice) Leaf  
260 Phytocomplexes: Identification of Licoflavanone as a Modulator of NF- $\kappa$ B/MAPK Pathway[J].  
261 *Antioxidants (Basel)*. 2019;8(6).
- 262 [29]. Liu W, Huang S, Li Y, Li Y, Li D, Wu P, Wang Q, Zheng X. Glycyrrhizic acid from licorice  
263 down-regulates inflammatory responses via blocking MAPK and PI3K/Akt-dependent NF- $\kappa$ B  
264 signalling pathways in TPA-induced skin inflammation[J]. *MEDCHEMCOMM*. 2018;9(9):1502-10.
- 265
- 266

267

Table 1 Pharmacokinetic information about six compounds

268

|                   | Hdon | Hacc | OB (%) | Caco-2 | DL   |
|-------------------|------|------|--------|--------|------|
| Formononetin      | 1    | 4    | 69.67  | 0.78   | 0.21 |
| Liquiritin        | 8    | 16   | 9.06   | -2.23  | 0.11 |
| Glycyrrhizin      | 5    | 9    | 65.69  | -1.06  | 0.74 |
| Glabridin         | 2    | 4    | 53.25  | 0.97   | 0.47 |
| Quercetin         | 5    | 7    | 46.43  | 0.05   | 0.28 |
| Isoliquiritigenin | 6    | 9    | 8.61   | -1.36  | 0.6  |

269

270

271

272

Table 2 GO enrichment analysis result

| ID         | Description                                             | pvalue   | Count |
|------------|---------------------------------------------------------|----------|-------|
| GO:0019902 | phosphatase binding                                     | 2.12E-09 | 9     |
| GO:0004713 | protein tyrosine kinase activity                        | 3.60E-09 | 8     |
| GO:0019903 | protein phosphatase binding                             | 5.09E-09 | 8     |
| GO:0004252 | serine-type endopeptidase activity                      | 1.46E-08 | 8     |
| GO:0004714 | transmembrane receptor protein tyrosine kinase activity | 2.03E-08 | 6     |
| GO:0008236 | serine-type peptidase activity                          | 3.98E-08 | 8     |
| GO:0017171 | serine hydrolase activity                               | 4.72E-08 | 8     |
| GO:0019199 | transmembrane receptor protein kinase activity          | 8.87E-08 | 6     |
| GO:0004175 | endopeptidase activity                                  | 2.61E-07 | 10    |
| GO:0004222 | metalloendopeptidase activity                           | 4.33E-07 | 6     |

273

274

Figure 1 The two and three demension structure compounds (A: formononetin; B: liquiritin; C: glycyrrhizin )

Figure 2 The two and three demension structure of conpounds

Figure 3 The target molecule of COPD and liquorice

Figure 4 The interaction network COPD, liquorice and molecular targets

Figure 5 The structure of protain-protain interaction network

Figure 6 PPI network link number

Figure 7 The top ten targets in the PPI network

Figure 8 The result of GO enrichment analysis

Figure 9 The result of KEGG enrichment analysis

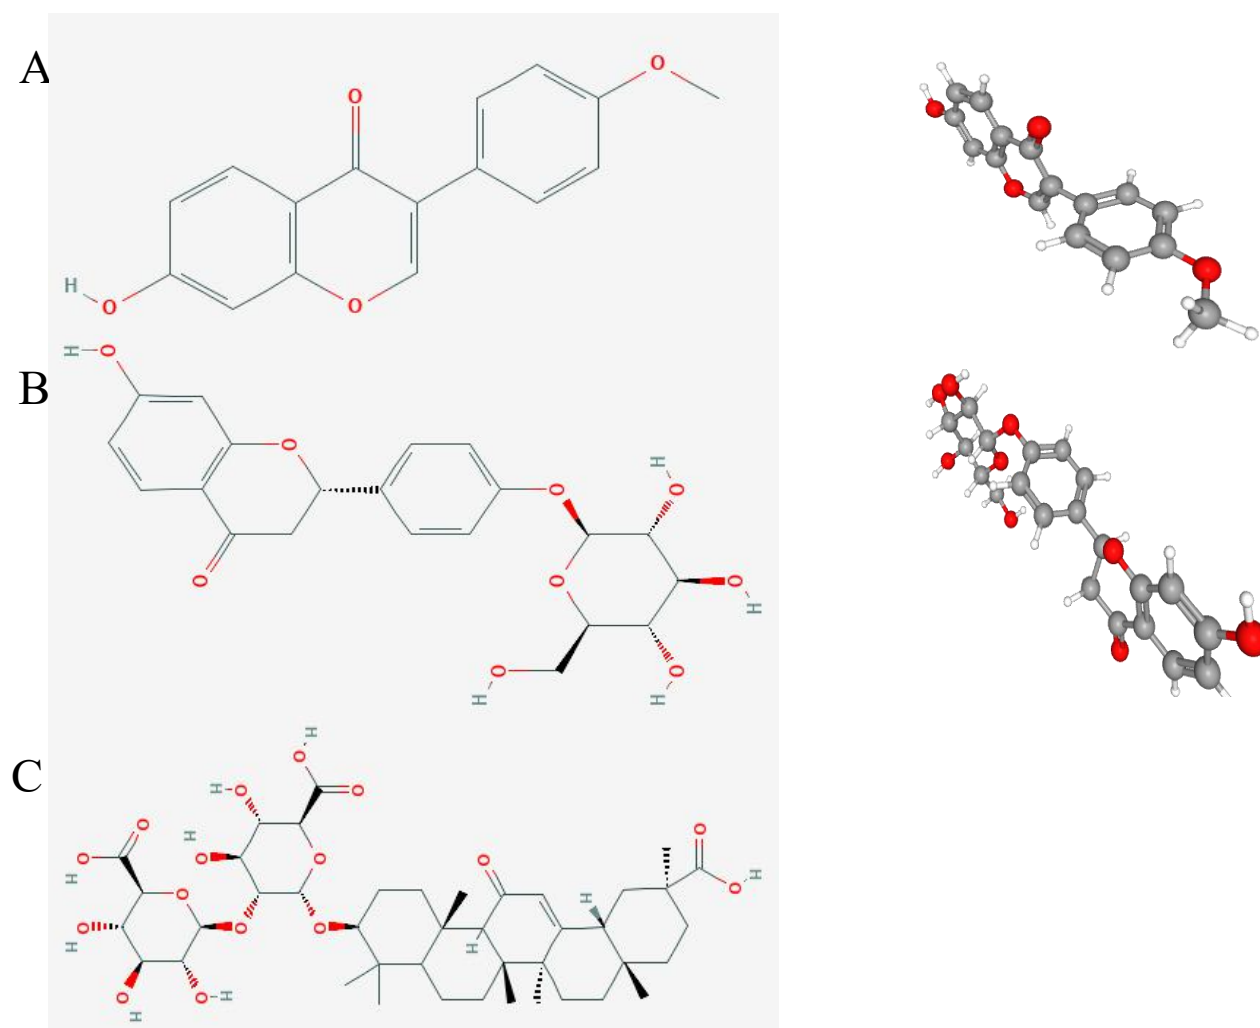

Figure 1 The two and three demension structure compounds (A: formononetin; B: liquiritin; C: glycyrrhizin )

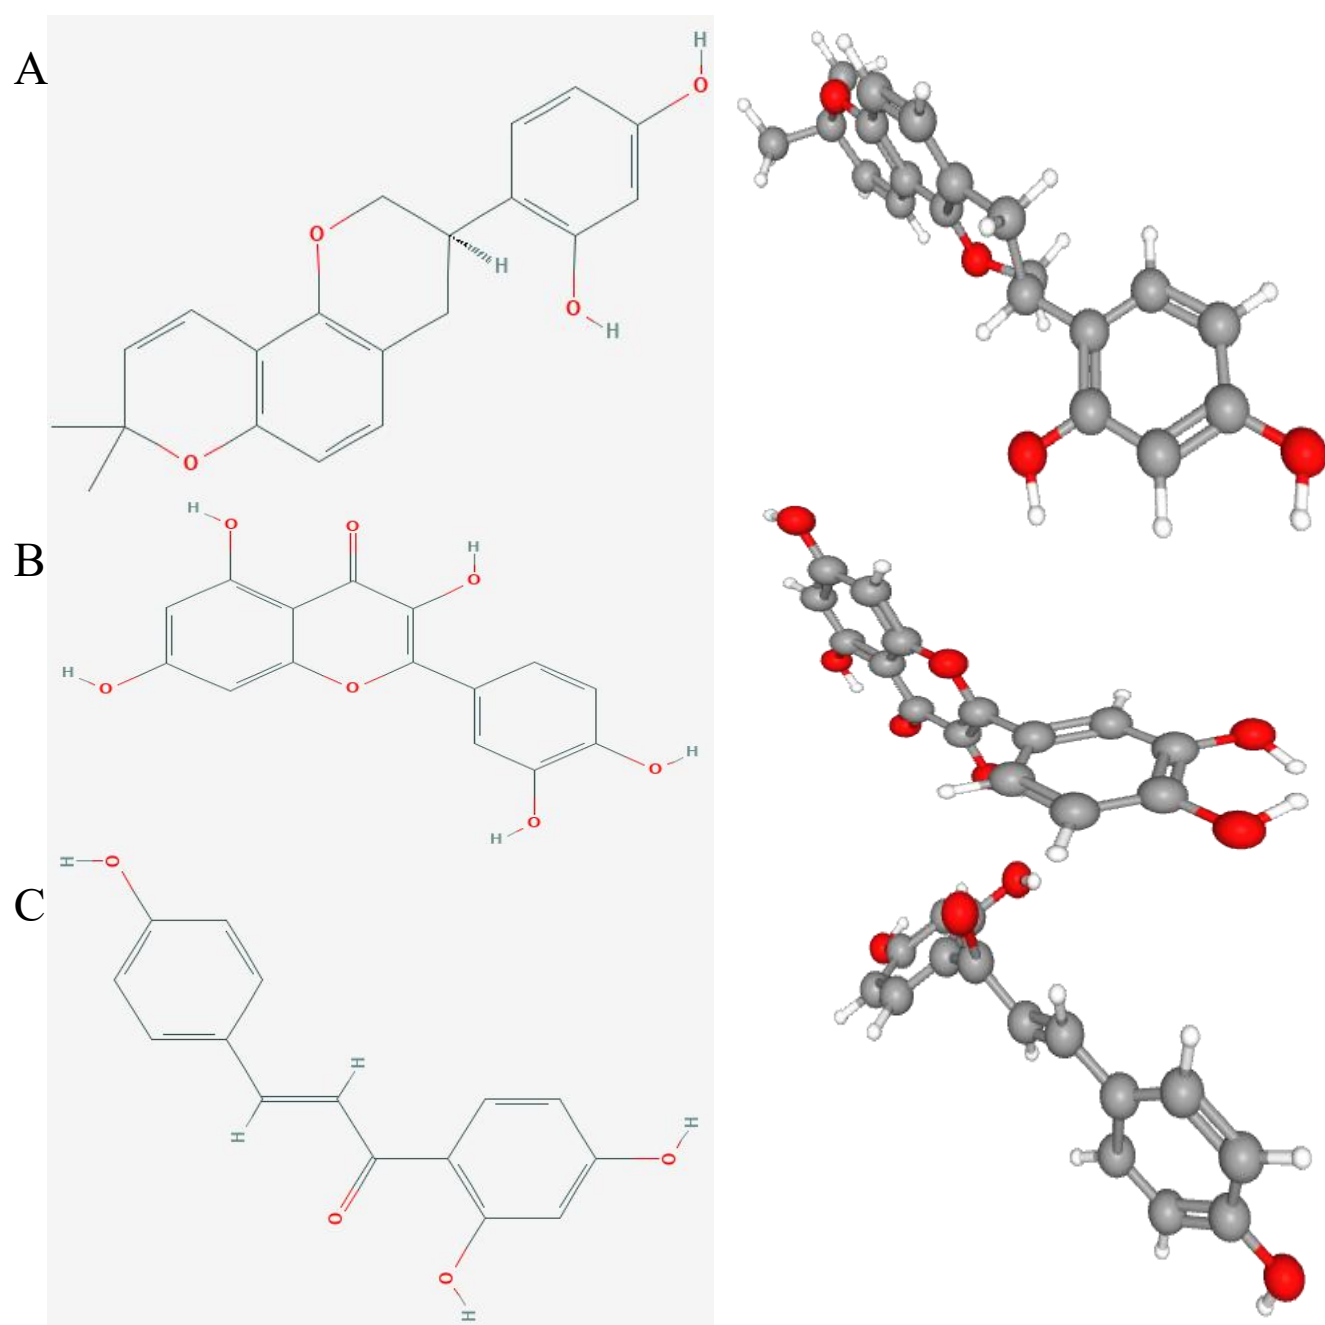

Figure 2 The two and three demension structure of compounds (A: glabridin; B: quercetin; C: isoliquiritigenin)

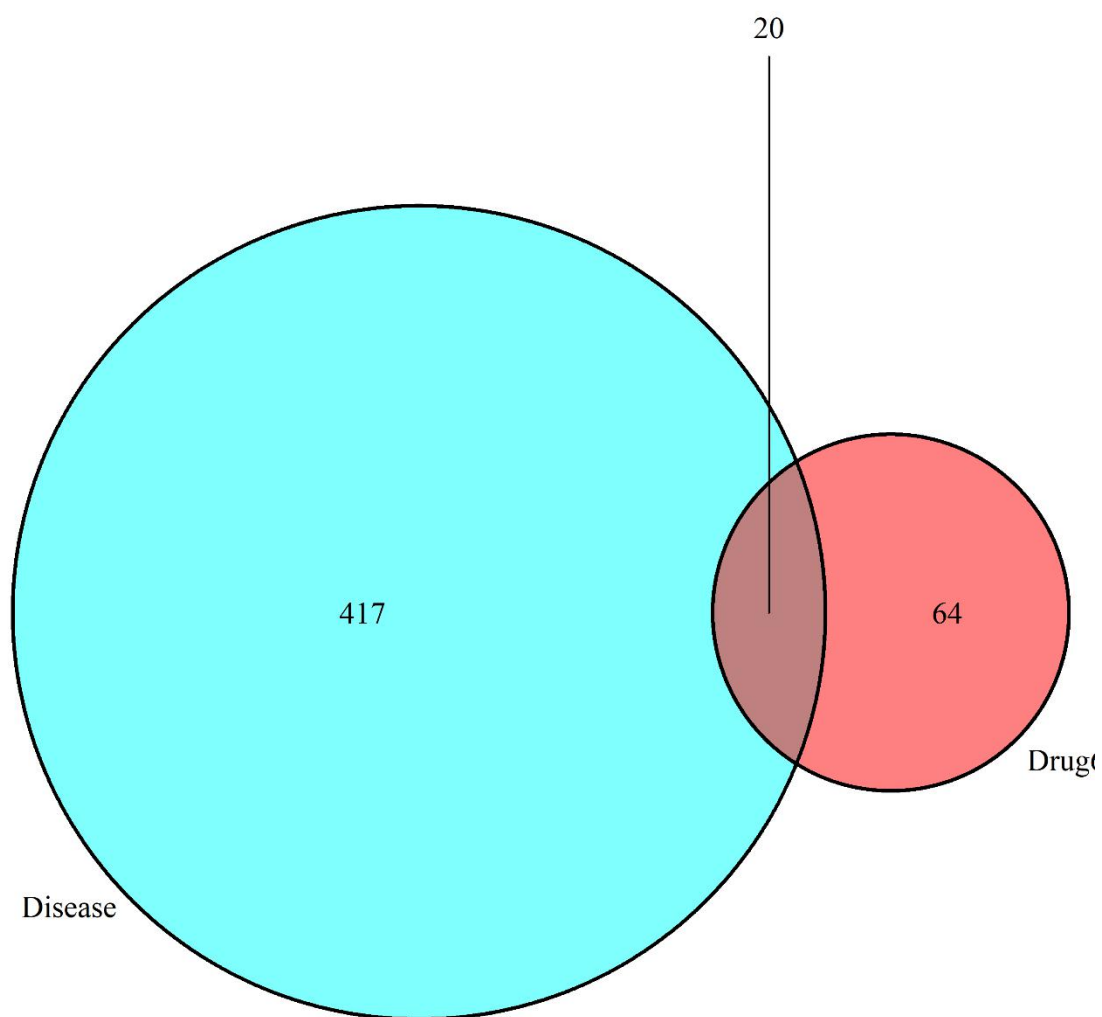

Figure 3 The target molecule of COPD and liquorice



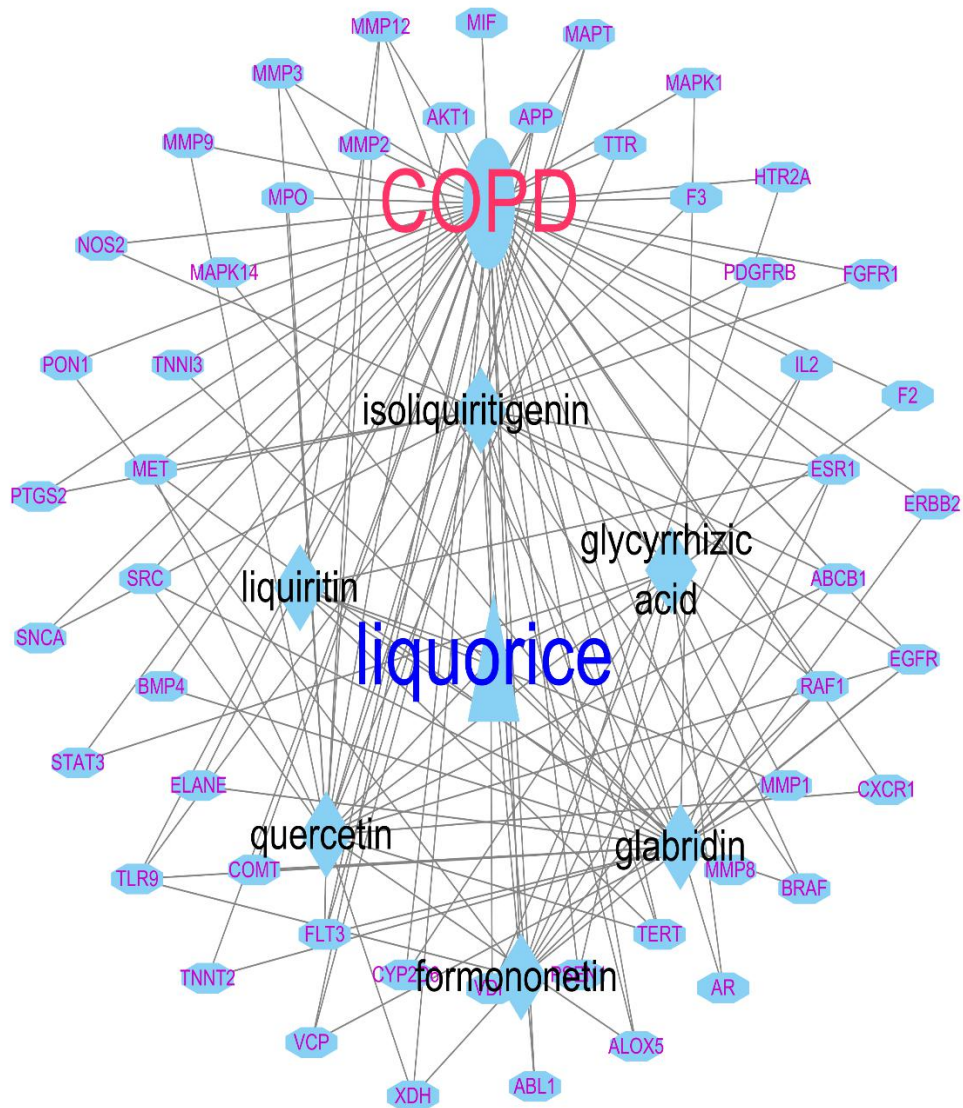

Figure 4 The interaction network COPD, liquorice and molecular targets

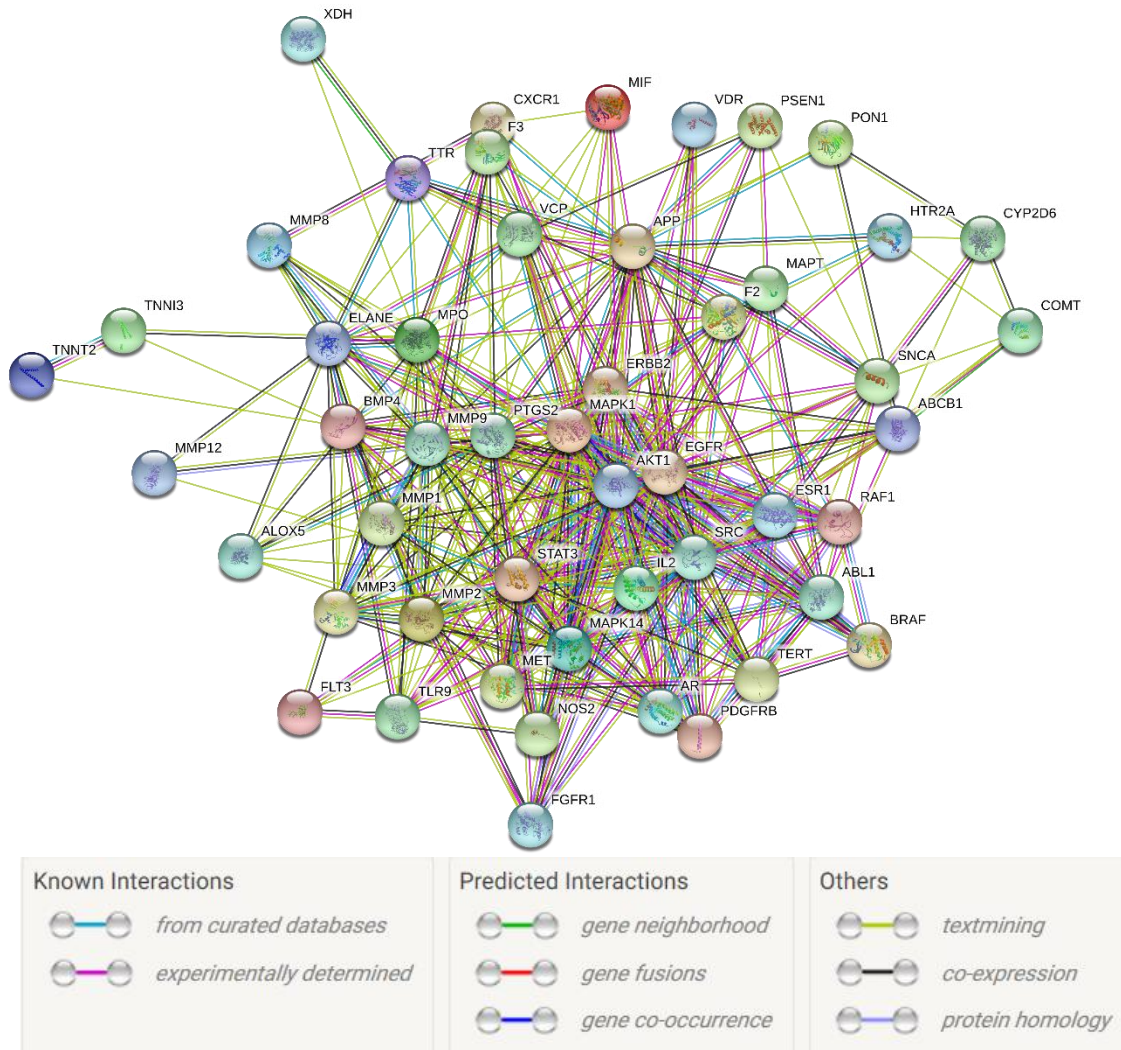

Figure 5 The structure of protein-protein interaction network

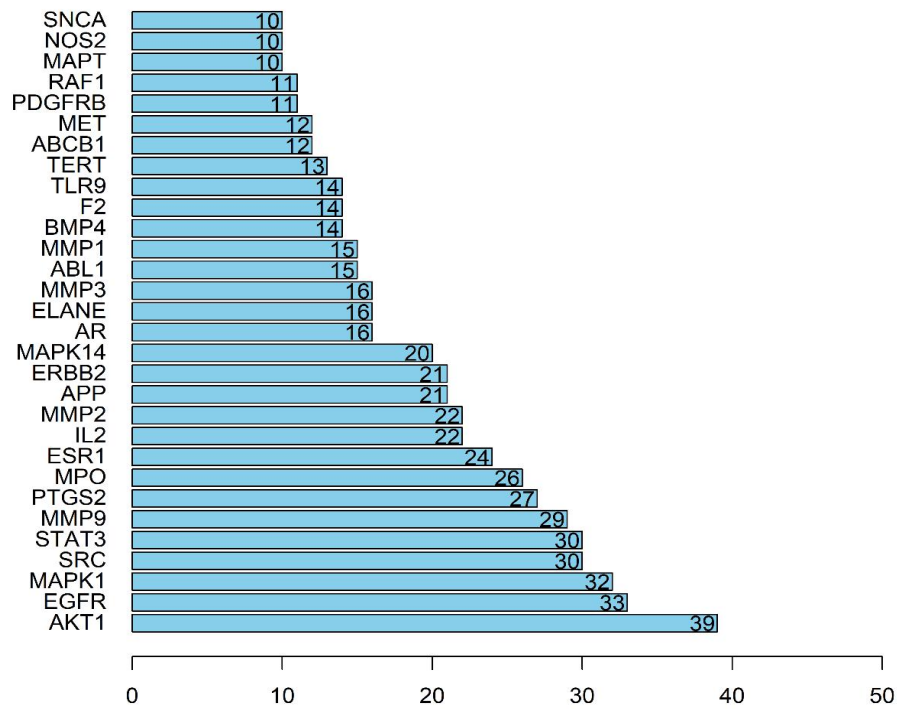

Figure 6 PPI network link number

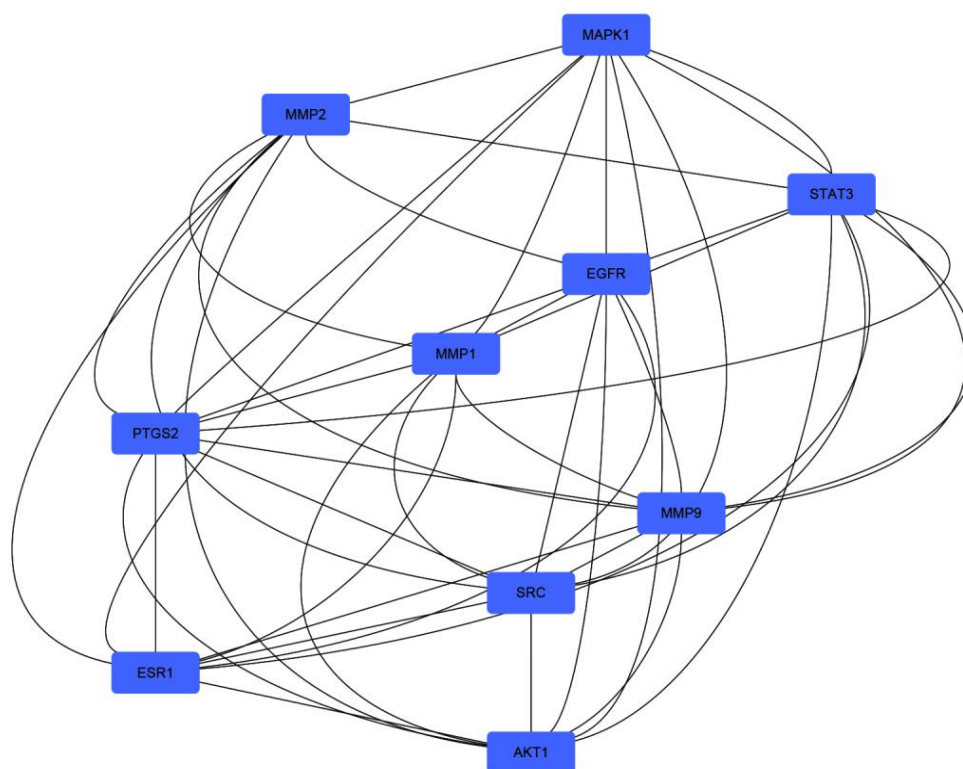

Figure 7 The top ten targets in the PPI network

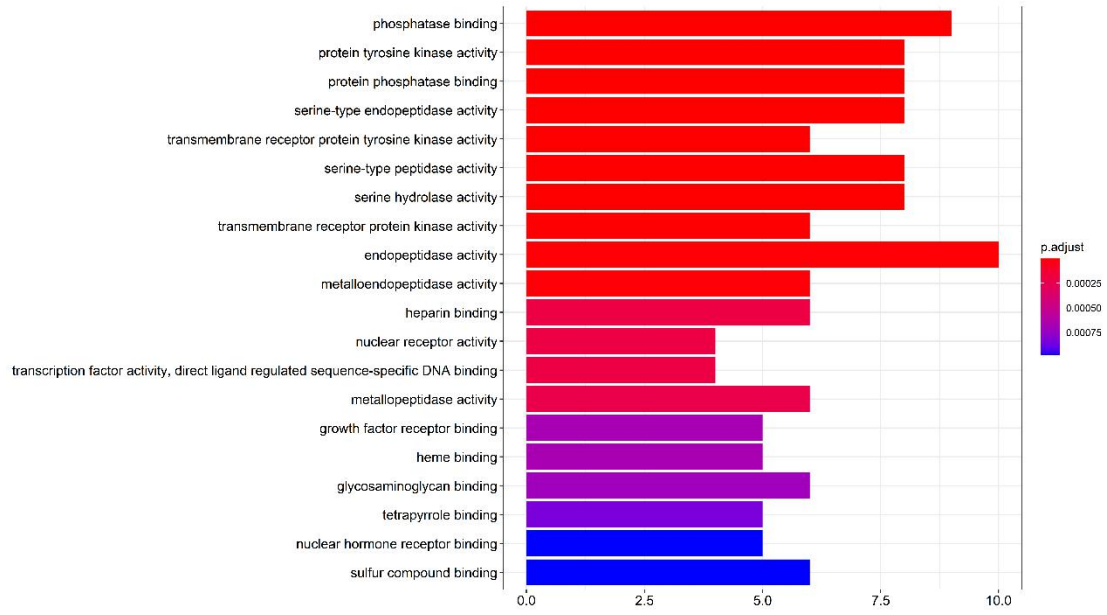

A

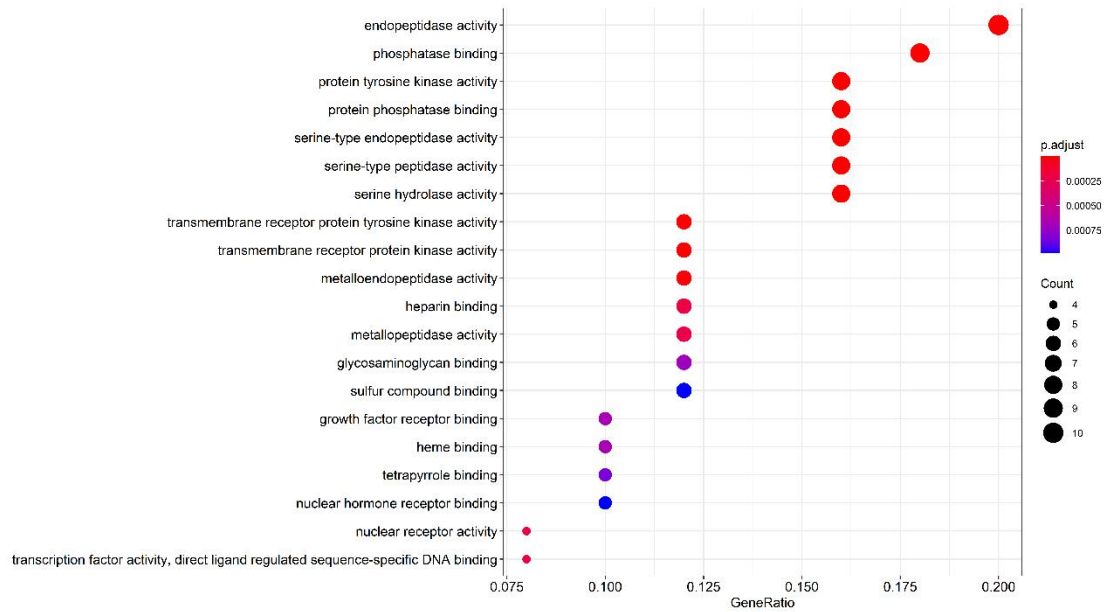

B

Figure 8 The result of GO enrichment analysis

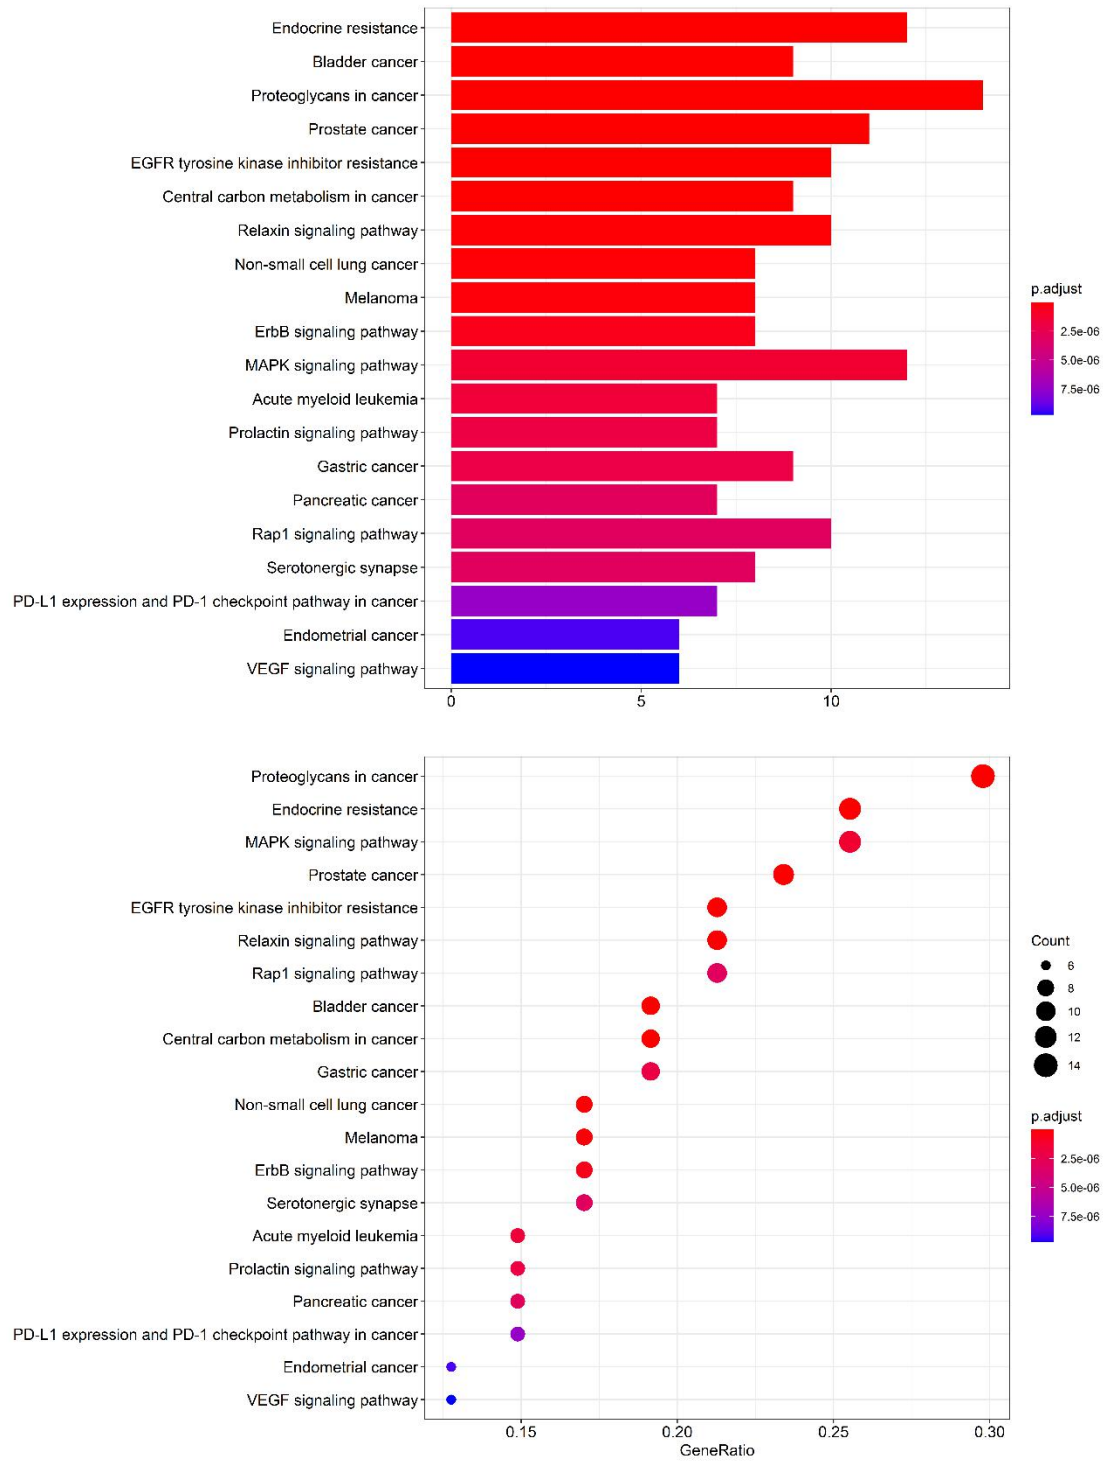

Figure 9 The result of KEGG enrichment analysis
